# Supplementary material for: A plasma-3D print combined in vitro platform with implications for reliable materiobiological screening
Source: Royal Society of Chemistry journal article supplement (doi:10.1039/d3tb02945j), 2024-01-01
Supplement: d3tb02945j1.pdf [file d3tb02945j1.pdf]

ESI updated: 12 June 2024

## Supporting Information

### **A Plasma-3D Print Combined *In Vitro* Platform with Implications for Reliable Materiobiological Screening†**

*Gerardo Hernandez Moreno<sup>a,‡</sup>, Vineeth M. Vijayan<sup>a,b,‡,\*</sup>, Brian A Halloran<sup>d</sup>, Namasivayam Ambalavanan<sup>d</sup>, Alexandria L. Hernandez Nichols<sup>e,f</sup>, John P. Bradford<sup>a</sup>, Renjith R. Pillai<sup>a</sup>, Vinoy Thomas<sup>a,c,\*</sup>*

*a. Department of Materials Science and Engineering, Laboratory for Polymers & Healthcare Materials/Devices, The University of Alabama at Birmingham (UAB), 1150 10th Ave S, Birmingham, AL 35233, United States*

*b. Laboratory for Polymeric Biomaterials, Department of Biomedical Engineering, Alabama State University (ASU), 915 S Jackson Street, Montgomery, Alabama, 36104, United States*

*c. Centre for Nanoscale Materials and Bio-integration (CNMB), The University of Alabama at Birmingham (UAB), 1720 2nd Ave S, Birmingham, AL 35294, United States*

*d. Department of Paediatrics, Division of Neonatology, The University of Alabama at Birmingham (UAB), 1670 University Boulevard, Birmingham, AL 35294, United States*

*e. Department of Pathology, Heersink School of Medicine, The University of Alabama at Birmingham (UAB), 619 South 19th Street, Birmingham, AL 35233, United States*

*f. Centre for Free Radical Biology (CfRB), The University of Alabama at Birmingham, 901 19th St S Birmingham AL 35294, United States.*

*‡ Equal Contribution*

*\* Corresponding Authors*

*E-mail: vthomas@uab.edu; vvijayan@alasu.edu*

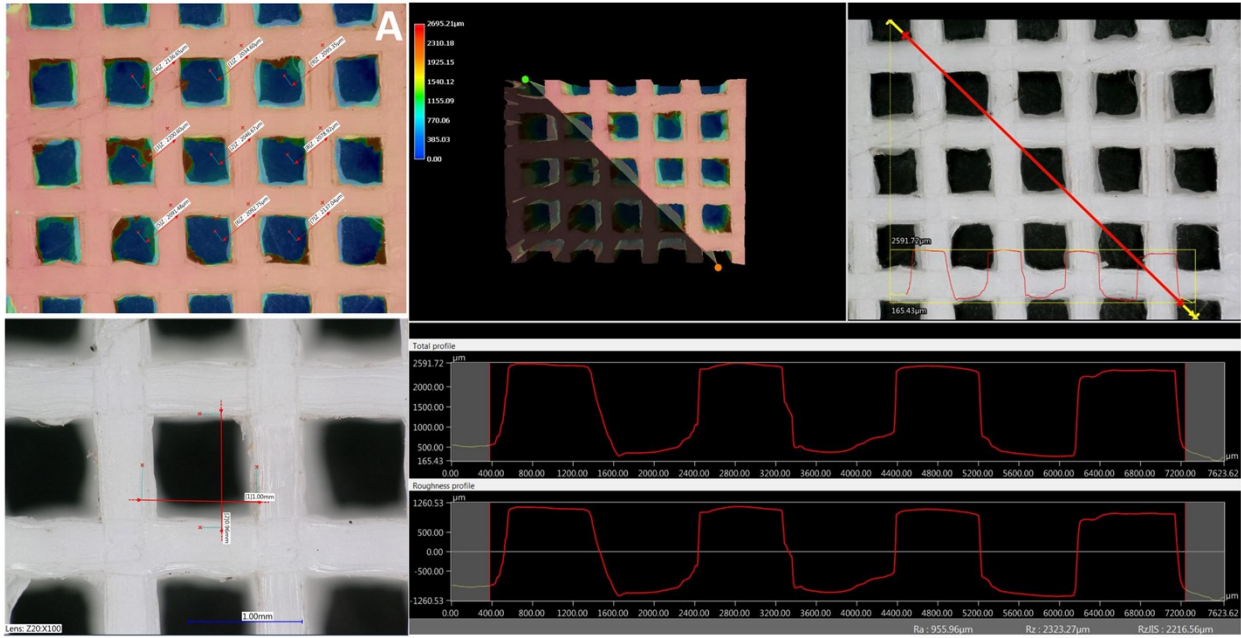

**Figure S1:** 3D Confocal Scanning Microscopy Images of 12 well plate 3D Printed design showing the pore size distribution across the diagonal and roughness profile measurements. Measurements done to determine the precision and consistency of the samples to the original design.

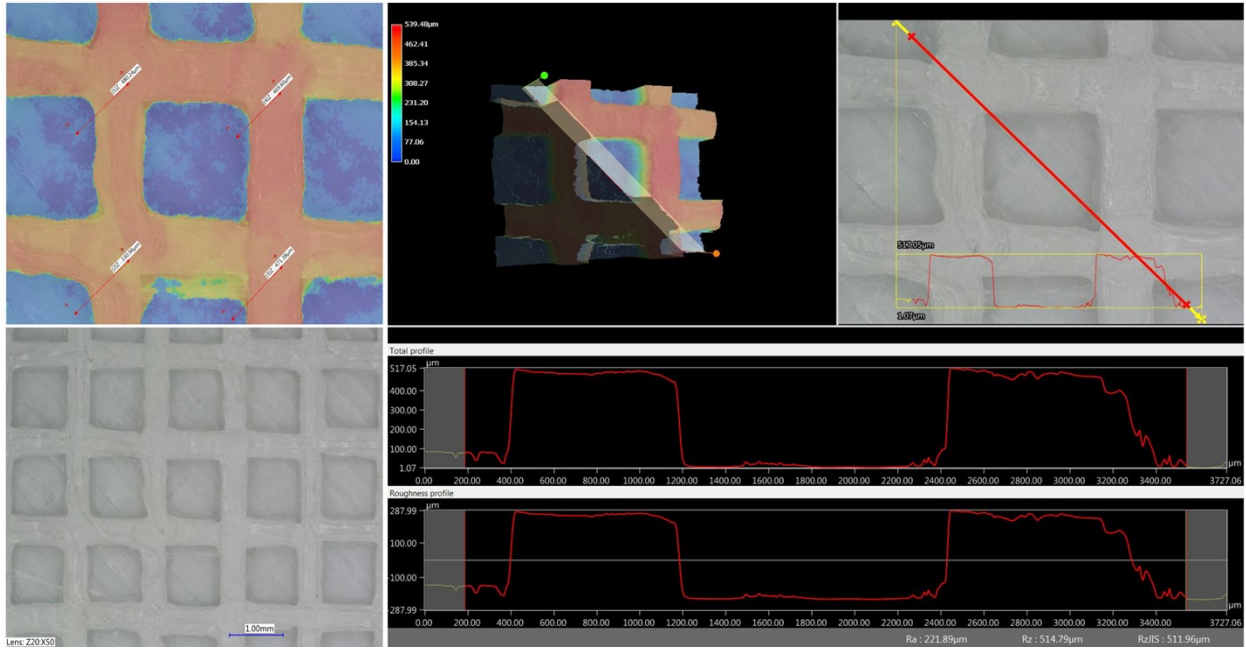

**Figure S2:** 3D Confocal Scanning Microscopy Images of 24 well plate 3D Printed design showing the pore size distribution across the diagonal and roughness profile measurements.

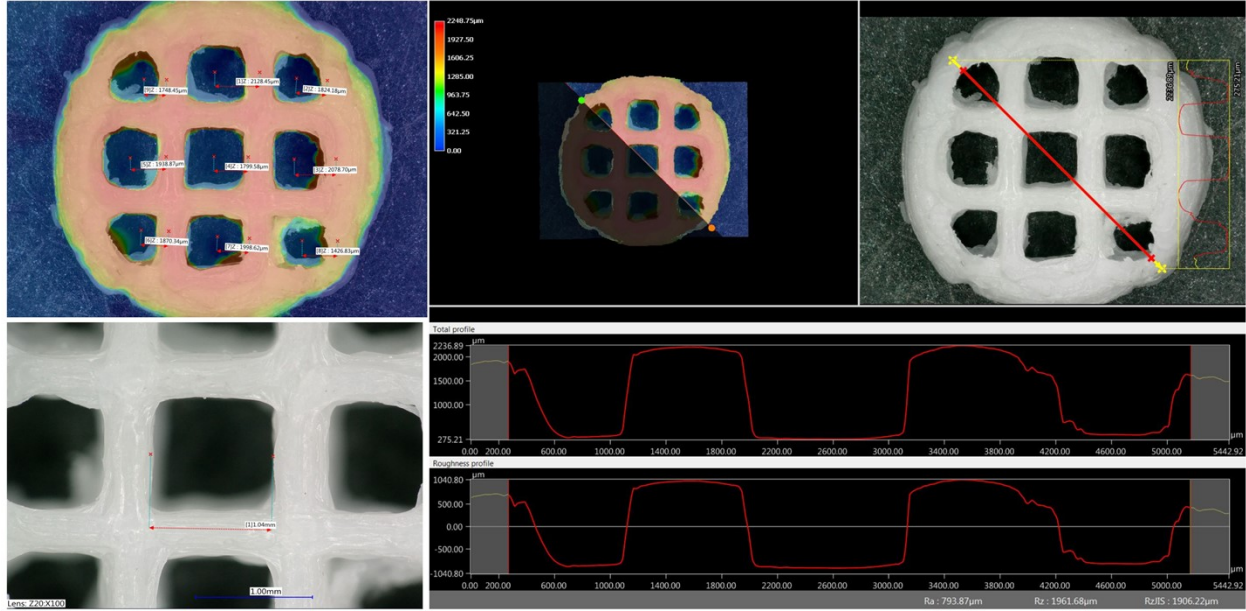

**Figure S3:** 3D Confocal Scanning Microscopy Images of 96 well plate 3D Printed design showing the pore size distribution across the diagonal and roughness profile measurements.

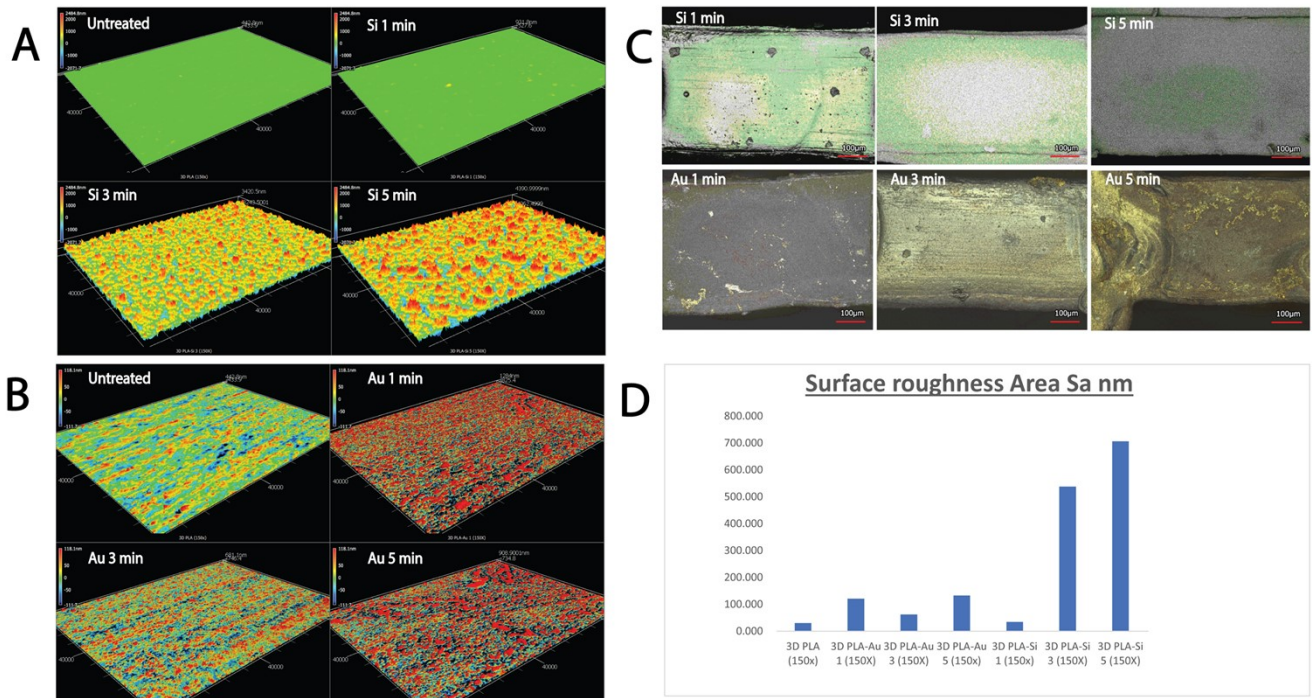

**Figure S4:** PER and dusty plasma nanoparticle synthesis optimization (A-C) Keyence 3D Confocal Laser Scanning Images of 96 well-plate-design 3D printed wafers treated with dusty silica plasma (A) and PER gold plasma (B) treated at 1 min, 3, min, and 5 min time points. All samples were compared to one untreated control. (C) Surface roughness measurements images of gold and silica nanoparticles from the 3D Confocal Laser Scanning Imaging (D) Quantitation of surface roughness measurements (n=1).

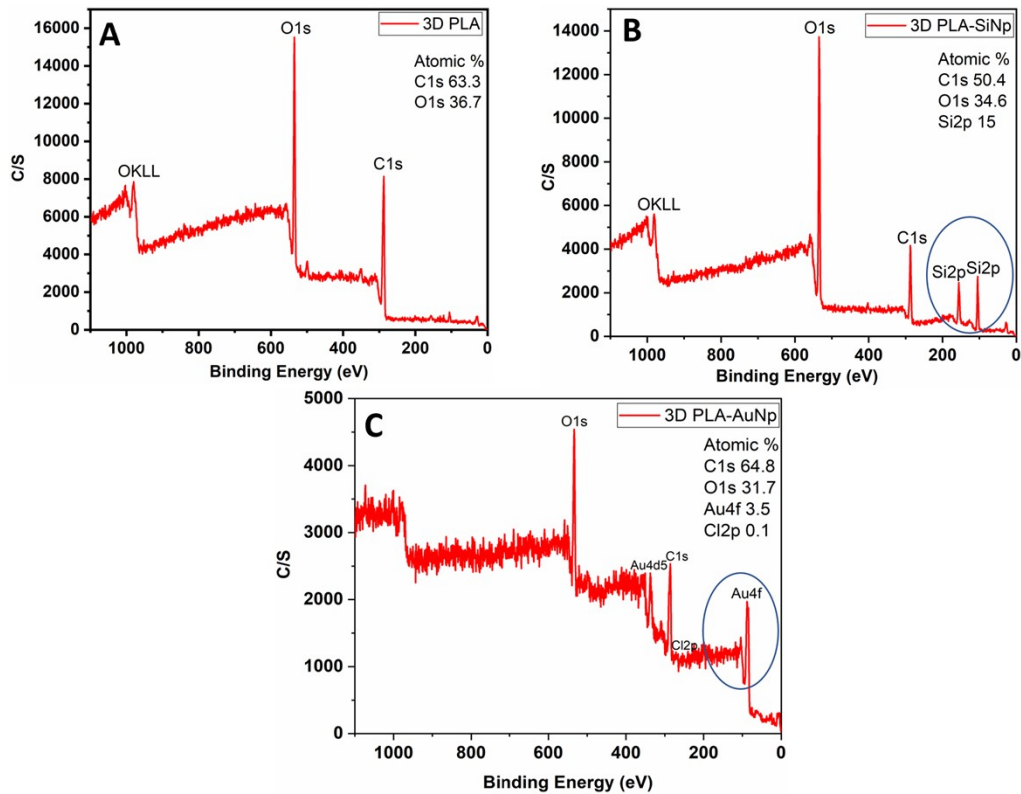

**Figure S5:** XPS Spectral Analysis of control 3D PLA (A), 3D PLA modified with silica nanoparticles (B), 3D PLA modified with gold nanoparticles (C). The XPS peaks representing silica and gold are circled.

| Characteristics                                                      | 96 Well Plate    | 24 Well Plate  | 12 Well Plate   |
|----------------------------------------------------------------------|------------------|----------------|-----------------|
| Pore Length in $\mu\text{m}$ , mean (SD)                             | 977.52 (18.07)   | 931.88 (37.77) | 904.63 (53.02)  |
| Pore Height in $\mu\text{m}$ , mean (SD)                             | 2035.19 (7.72)   | 530.30 (39.54) | 2300.55 (12.98) |
| <b>Surface Roughness Parameters in <math>\mu\text{m}</math> (SD)</b> |                  |                |                 |
| Ra                                                                   | 934.82 (50.46)   | 178.45 (11.51) | 979.54 (96.84)  |
| Rz                                                                   | 2034.74 (7.62)   | 530.27 (39.52) | 2300.23 (13.05) |
| Rp                                                                   | 948.17 (103.41)  | 283.23 (12.87) | 1079.67 (89.79) |
| Rv                                                                   | 1086.58 (109.45) | 247.05 (32.05) | 1220.56 (82.13) |
| Rt                                                                   | 2034.74 (7.62)   | 530.28 (39.53) | 2300.23 (13.05) |
| Rq                                                                   | 959.35 (34.40)   | 190.00 (9.40)  | 1020.76 (93.14) |
| Rsk                                                                  | -0.30 (0.20)     | 0.35 (0.10)    | -0.20 (0.07)    |
| Rku                                                                  | 1.14 (0.08)      | 1.48 (0.18)    | 1.19 (0.13)     |
| Rdq                                                                  | 16.46 (2.83)     | 3.59 (0.36)    | 16.76 (3.21)    |

**Figure S6:** Spatial measurements and surface roughness parameters from 3D Confocal Scanning Microscopy Images taken via a Keyence imaging system with  $n = 4$ .
